# Supplementary material
Source: MDPI journal article supplement (https://www.mdpi.com/1424-2818/13/6/231)

# Ecology and conservation of Lao Langur *Trachypithecus laotum* in a protected area of Laos (Southeast Asia)

Johnny Souwideth <sup>1</sup>, Phaivanh Phiapalath <sup>2</sup>, Hai Dong Thanh <sup>1</sup>, Peter Brakels <sup>3</sup>, Thong Pham Van <sup>4</sup>, and Luca Luiselli <sup>5,6,7,\*</sup>

<sup>1</sup> Vietnam National University of Forestry, street 21, Xuan Mai town, Chuong My district, 100000 Hanoi, Vietnam; email: johnnyblack1991@gmail.com; donghaifuv@gmail.com

<sup>2</sup> Freelance Consultant, Vientiane, Laos; email: p.phiapalath@gmail.com

<sup>3</sup> IUCN Vientiane Office, 391/24 Bourichane Road, Ban Naxay, Sayssetta District, Vientiane, Laos; email: peter.brakels@iucn.org

<sup>4</sup> Save Vietnam Wildlife, Cuc Phuong National Park, Cuc Phuong commune, Nho Quan district, 430000 Ninh Binh province, Vietnam. Email: thong@swv.vn

<sup>5</sup> Institute for Development, Ecology, Conservation and Cooperation, via G. Tomasi di Lampedusa 33 - 00144 Rome, Italy; email: l.luiselli@ideccngo.org; lucamaria.luiselli@uniroma3.it

<sup>6</sup> Department of Applied and Environmental Biology, Rivers State University of Science and Technology, P.M.B. 5080, Port Harcourt, Nigeria

<sup>7</sup> Département de Zoologie et Biologie Animale, Faculté des Sciences, Université de Lomé, B.P. 1515, Lomé, Togo

\* Correspondence: l.luiselli@ideccngo.org

## ONLINE SUPPLEMENTAL MATERIALS

**Citation:** Souwideth, J.; Phiapalath, P.; Thanh, H.D.; Brakels, P.; Van, T.P.; Luiselli, L. Ecology and Conservation of the Laotian langur *Trachypithecus laotum* in a Protected Area of Laos (Southeast Asia). *Diversity* **2021**, *13*, 231. <https://doi.org/10.3390/d13060231>

Academic Editor: Michael Wink

Received: 27 April 2021

Accepted: 19 May 2021

Published: 25 May 2021

**Publisher's Note:** MDPI stays neutral with regard to jurisdictional claims in published maps and institutional affiliations.

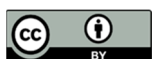

**Copyright:** © 2021 by the authors. Licensee MDPI, Basel, Switzerland. This article is an open access article distributed under the terms and conditions of the Creative Commons Attribution (CC BY) license (<https://creativecommons.org/licenses/by/4.0/>).

**Table S1.** List of the ten questions forming the standardized questionnaire for the various interviewees at the study area. For more details, see the methods

1. Are there any monkeys in PHP-NPA?
2. How many species?
3. Do you know or have you seen the Lao langur (=Khounng) at your site?
4. How does the Lao langur look like? [showing the photo after this time in case of clearly correct description of the species].
5. Where did you see them?
6. Have you seen Lao langur in the past?
7. Are there many Lao langur individuals still found in the forest in your area?
8. Based on your experience, Lao Langur increased or decreased in abundance at your site during the years of your surveys? That is, can you compare past and present abundance of Lao langur at your site?
9. [if the interviewee noticed a decline of species' abundance] Why did the Lao langur decrease?
10. What do you do with Lao langur in case of capture?

**Table S2:** Field effort (in terms of km walked) of each trail during this survey.

| <b>Trails</b>                | <b>Length (Km)*</b> |
|------------------------------|---------------------|
| <i>Sector: Konglor-Natan</i> | <i>14.9</i>         |
| Trail 1: Tham Huator         | 3                   |
| Trail 2: Konglor Cave        | 2.5                 |
| Trail 3: Poug Ta Thid Pha    | 2.6                 |
| Trail 4: Kouan Xone          | 3.5                 |
| Trail 5: Pha Tang            | 3.3                 |
| <i>Sector: Konglor</i>       | <i>32.8</i>         |
| Trail 6: Pha Soung           | 2.3                 |
| Trail 7: Pha Hom             | 2.9                 |
| Trail 8: Phou Hon Khuarn     | 3.3                 |
| Trail 9: Ang Nam Ta Ngon     | 2.5                 |
| Trail 10: Phou Khar          | 4.2                 |
| Trail 11: Nong Ka Pard       | 5.8                 |
| Trail 12: Huay Lurk          | 3                   |
| Trail 13: Ang Khee Ther      | 4                   |
| Trail 14: Phou Hai           | 2.1                 |
| Trail 15: Kouan Dig          | 2.7                 |
| <i>Sector: Buamlou</i>       | <i>5</i>            |
| Trail 16: Kouan Pang         | 3.1                 |
| Trail 17: Phou Muang Khai    | 1.9                 |
| <i>Sector: Kuankacha</i>     | <i>11.4</i>         |
| Trail 18: Kouan Phai         | 1.9                 |
| Trail 19: Hew Nam            | 2.9                 |
| Trail 20: Kouan Or           | 3.9                 |
| Trail 21: Pha Luang          | 2.7                 |

\*Length is calculated based on the tracking tool of the GPS – Only one way is included in the calculation (Double count of trail walked on the way back is not included)

**Figure S1:** Field survey trails throughout the various sectors of the study area. Trails walked with locations of the Lao langurs encountered are presented.

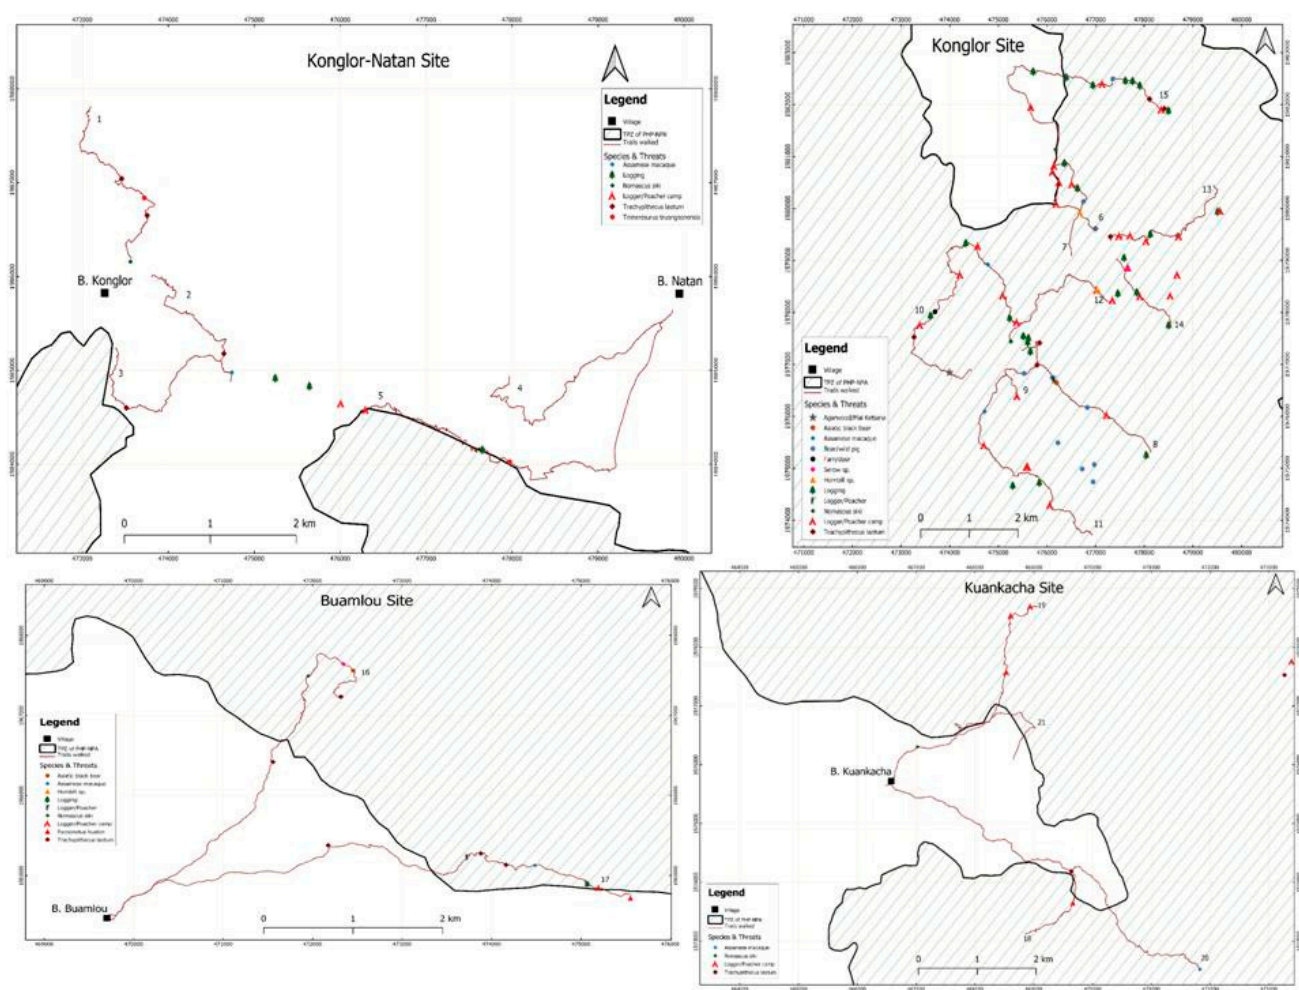

**Figure S2:** Coloration differences between adults and juvenile langurs at the study area. Photo (A): adult. Photo (B): juvenile.

(A)

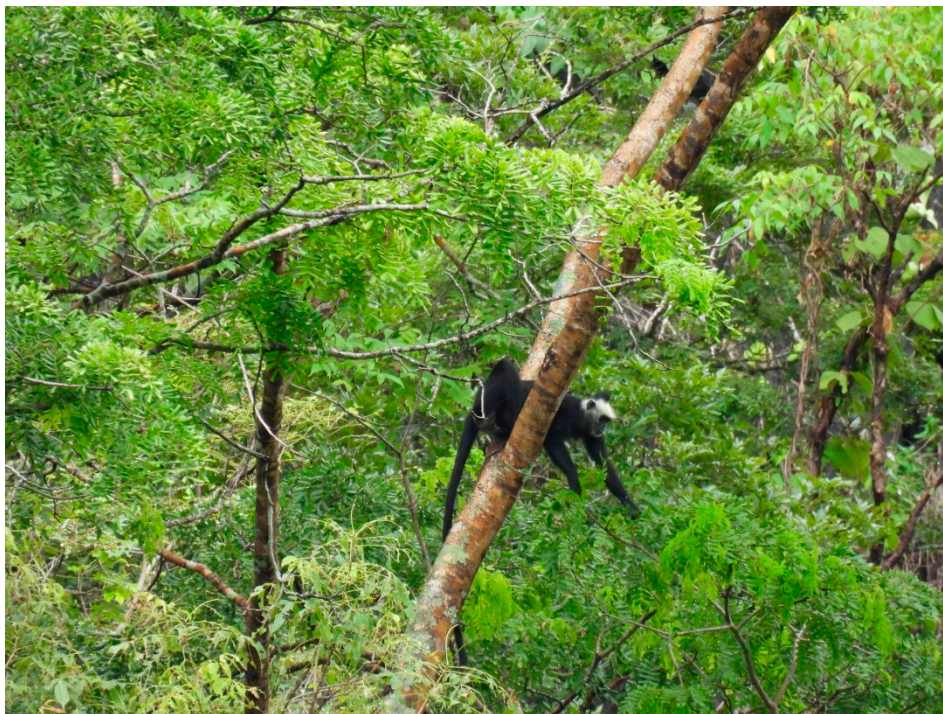

(B)

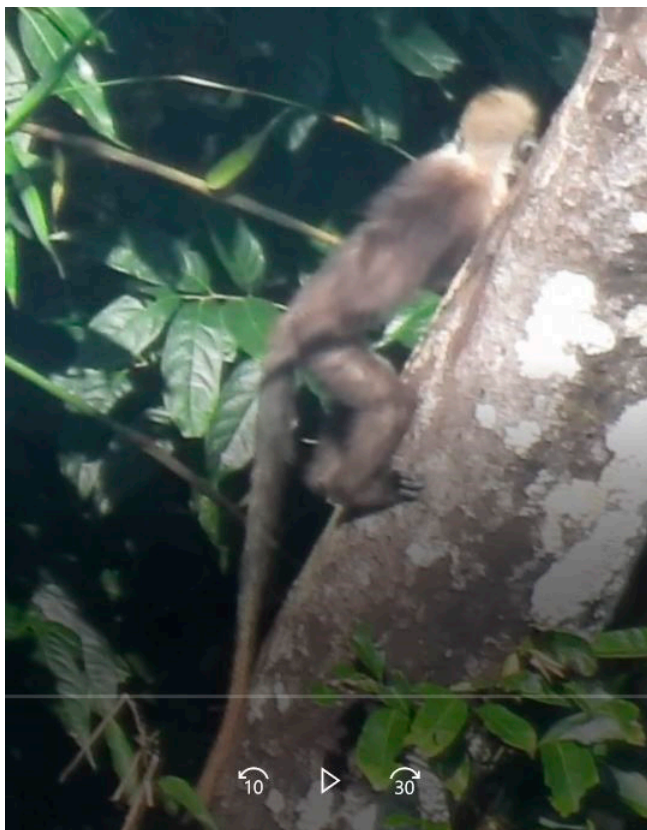

Supplement: s1 [file s1]
